# Corrigendum: Clinical Features and HLA Association of 5-Aminosalicylate (5-ASA)-induced Nephrotoxicity in Inflammatory Bowel Disease

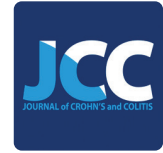

**Graham A. Heap<sup>a,b</sup>, Kenji So<sup>a,b</sup>, Mike Weedon<sup>b</sup>, Naomi Edney<sup>c</sup>,  
Claire Bewshea<sup>a,b</sup>, Abhey Singh<sup>a,b</sup>, Vito Annese<sup>d</sup>, John Beckly<sup>e</sup>,  
Dorien Buurman<sup>f,g</sup>, Rakesh Chaudhary<sup>h</sup>, et al.\***

<sup>a</sup>IBD Pharmacogenetics, Royal Devon and Exeter Foundation Trust, Exeter, UK <sup>b</sup>Precision Medicine Exeter, University of Exeter, Exeter, UK <sup>c</sup>Exeter Kidney Unit, Royal Devon and Exeter Foundation Trust, Exeter, UK <sup>d</sup>University Hospital AOU, Department of Emergency, 2nd Gastroenterology Unit, Florence, Italy <sup>e</sup>Royal Cornwall Hospital NHS Trust, Penventinnie Lane, Truro, UK <sup>f</sup>Department of Gastroenterology and Hepatology, University of Groningen, Groningen, The Netherlands <sup>g</sup>University Medical Center Groningen, Groningen, The Netherlands <sup>h</sup>Department of Gastroenterology, West Hertfordshire Hospitals NHS Trust, Watford General Hospital, Watford, UK

\*The remaining authors are listed after the Acknowledgements section

10.1093/ecco-jcc/jjv219

In the original article, the full author list contained an error in the spelling of one of the author's names. Ian Lawrance was incorrectly spelt as Ian Lawrence. This has now been corrected.
